# Supplementary material for: One-step fabrication of a self-supported Co@CoTe2 electrocatalyst for efficient and durable oxygen evolution reactions
Source: Royal Society of Chemistry journal article supplement (doi:10.1039/d0qi00372g), 2020-01-01
Supplement: d0qi00372g1.pdf [file d0qi00372g1.pdf]

*Supplementary information*

---

## **One-Step Fabrication of Self-supported Co@CoTe<sub>2</sub> Electrocatalyst for Efficient and Durable Oxygen Evolution Reaction**

Yu Qi,<sup>†,a</sup> Jie Wu,<sup>†,a</sup> Junyuan Xu,<sup>b</sup> Han Gao,<sup>a</sup> Zijuan Du,<sup>a</sup> Baoshun Liu,<sup>a</sup> Lifeng Liu,<sup>b</sup> and Dehua Xiong<sup>\*,ac</sup>

<sup>a</sup> State Key Laboratory of Silicate Materials for Architectures, Wuhan University of Technology, Wuhan 430070, P. R. China

\* Corresponding author Email: xiongdehua2010@gmail.com (Dehua Xiong)

<sup>b</sup> International Iberian Nanotechnology Laboratory (INL), Avenida Mestre Jose Veiga, 4715-330 Braga, Portugal.

<sup>c</sup> Wuhan National Laboratory for Optoelectronics, Huazhong University of Science and Technology, Wuhan 430074, P. R. China

† Y. Q. and J. W. contributed equally.

### **List of contents:**

|                            |         |
|----------------------------|---------|
| Experimental details.....  | S2-S4   |
| Supplementary figures..... | S5-S11  |
| Fig. S1.....               | S5      |
| Fig. S2.....               | S6      |
| Fig. S3.....               | S7      |
| Fig. S4.....               | S8      |
| Fig. S5.....               | S9      |
| Fig. S6.....               | S10     |
| Fig. S7.....               | S11     |
| Fig. S8.....               | S12     |
| Fig. S9.....               | S13     |
| Fig. S10.....              | S13     |
| Fig. S11.....              | S15     |
| Supplementary Tables.....  | S16-S19 |
| Table S1.....              | S16-18  |
| Table S2.....              | S19     |

## **Experimental details:**

### **Materials synthesis**

All chemicals used are of analytical grade and were purchased from Sinopharm Chemical Reagent Co., Ltd. Prior to hydrothermal reaction, the Co foam (110 PPI, 1 mm thick) was cleaned by ultrasonication in 1.0 M HCl for 5 min to remove the surface oxide layer, washed successively in water and acetone, and finally dried at 60 °C in vacuum for 30 min. In a typical hydrothermal experiment, 0.443 g sodium tellurite ( $\text{Na}_2\text{TeO}_3$ ) was dissolved in 65 mL of deionized (DI) water to form a homogeneous solution by continuous magnetic stirring for 30 min. Subsequently, 5 ml hydrazine hydrate ( $\text{N}_2\text{H}_4\cdot\text{H}_2\text{O}$ ) used as reducing agent was added into the above solution. The precursor reagents were stirred for another 30 minutes at room temperature until a homogeneous suspension was formed, and then the solution was loaded into a 100 mL Teflon-lined autoclave reactor where a piece of cleaned Co foam ( $\sim 3.0 \times 4.0 \text{ cm}^2$ ) was placed against the wall. Subsequently, the autoclave reactor was sealed, heated to 200 °C or 240 °C (denoted as Co@CoTe<sub>2</sub>-200 and Co@CoTe<sub>2</sub>-240) and maintained 24 hours for reaction. Finally, the reactor was naturally cooled down to room temperature. After the hydrothermal processing, the color of Co foam turned to dark black from light grey, suggesting the formation of CoTe<sub>2</sub> nanoparticles on the foam surface. The resultant sample was then rinsed successively with DI water and ethanol, and dried in a N<sub>2</sub> flow.

### **Structural characterization**

The morphology, microstructure, and chemical composition of Co@CoTe<sub>2</sub> electrodes were examined by field-emission scanning electron microscopy (FESEM, FEG Quanta

450) and transmission electron microscopy (TEM, JEOL JEM-2100 operating at 200 keV) equipped with energy-dispersive X-ray spectroscopy (EDX). The crystalline structure of samples was studied by X-ray diffractometry (XRD, PANalytical X'Pert PRO) using Cu K $\alpha$  radiation ( $\lambda = 1.540598 \text{ \AA}$ ) and a PIXcel detector. The surface chemical states of Co@CoTe<sub>2</sub> were analyzed by X-ray photoelectron spectroscopy (XPS, Thermo Escalab 250Xi), and the C (1s) line (at 284.70 eV) corresponding to the surface adventitious carbon (C–C line bond) has been used as the reference binding energy.

### **Electrochemical measurements**

The OER performance was evaluated by cyclic voltammetry (CV), chronopotentiometry (CP) and electrochemical impedance spectroscopy (EIS) in a three-electrode configuration in 1.0 M KOH (pH = 13.5) using a CS2350H electrochemical workstation (Wuhan Corrtest Instruments Corp., China). A platinum wire and a saturated calomel electrode (SCE) were used as the counter and reference electrodes, respectively. The as-fabricated Co@CoTe<sub>2</sub> working electrode was directly used as the working electrode, and the active electrode area was kept to 1×1 cm<sup>2</sup>. Cyclic voltammetric (CV) scans were recorded between 1.00 and 1.70 V vs. reversible hydrogen electrode (RHE) at the scan rates from 1 to 20 mV s<sup>-1</sup>. The electrochemical double-layer capacitance (C<sub>dl</sub>) of each sample was measured given that C<sub>dl</sub> is positively proportional to the effective surface areas (ESA). C<sub>dl</sub> can be extracted through CV scans at different rates (from 10 to 100 mV s<sup>-1</sup>) in the non-faradaic potential window of -0.05-0.05 V vs. SCE. All current density values were normalized with respect to the

geometrical surface area of the working electrode. For comparison, the electrocatalytic performance of a bare Co foam was also measured. All CV curves presented in this work are  $iR$ -corrected (85%), and the correction was done according to the following equation:

$$E_c = E_m - iR_s \quad (S1)$$

where  $E_c$  is the  $iR$ -corrected potential,  $E_m$  experimentally measured potential, and  $R_s$  the equivalent series resistance extracted from the electrochemical impedance spectroscopy (EIS) measurements. Unless otherwise specified, all potentials are reported versus reversible hydrogen electrode (RHE) by converting the potentials measured vs. SCE according to the following formula:

$$E \text{ (RHE)} = E \text{ (SCE)} + 0.241 + 0.059 \text{ pH} \quad (S2)$$

The EIS measurements were performed in the frequency range of 10 mHz – 100 kHz under a constant potential of 1.60 V vs. RHE. The mass activity (MA,  $A \text{ g}^{-1}$ ) value of sample was calculated from the loading mass ( $M$ ,  $\text{mg cm}^{-2}$ ) of each electrocatalyst and the measured current density ( $J$ ,  $\text{mA cm}^{-2}$ ) at different overpotentials, such as  $\eta = 270$ , 290, 310, 330 and 350 mV:

$$\text{MA} = J/M \quad (S3)$$

Supplementary figures:

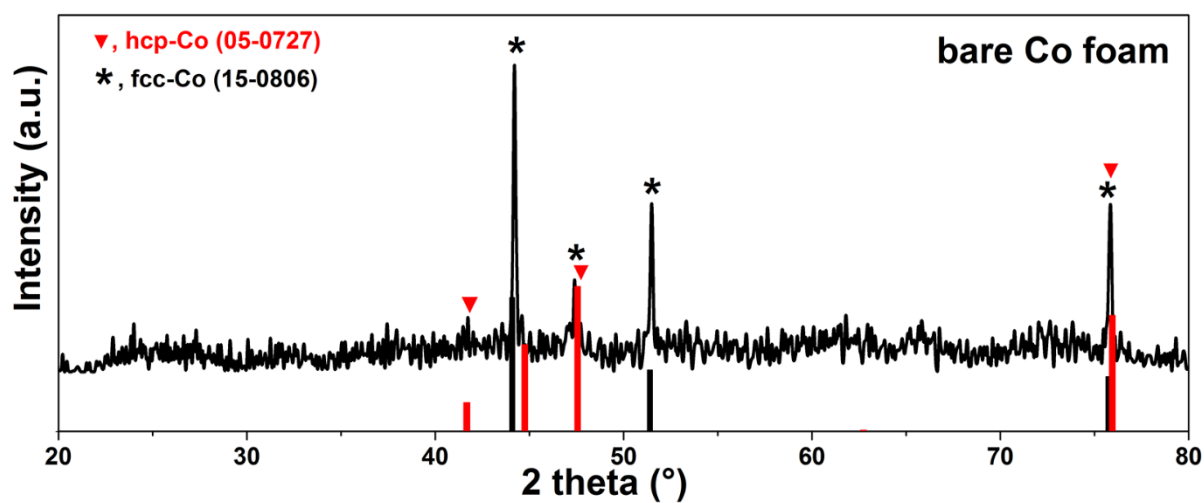

Fig. S1. XRD pattern of a bare Co foam. The standard powder diffraction pattern of metallic cobalt is given for reference.

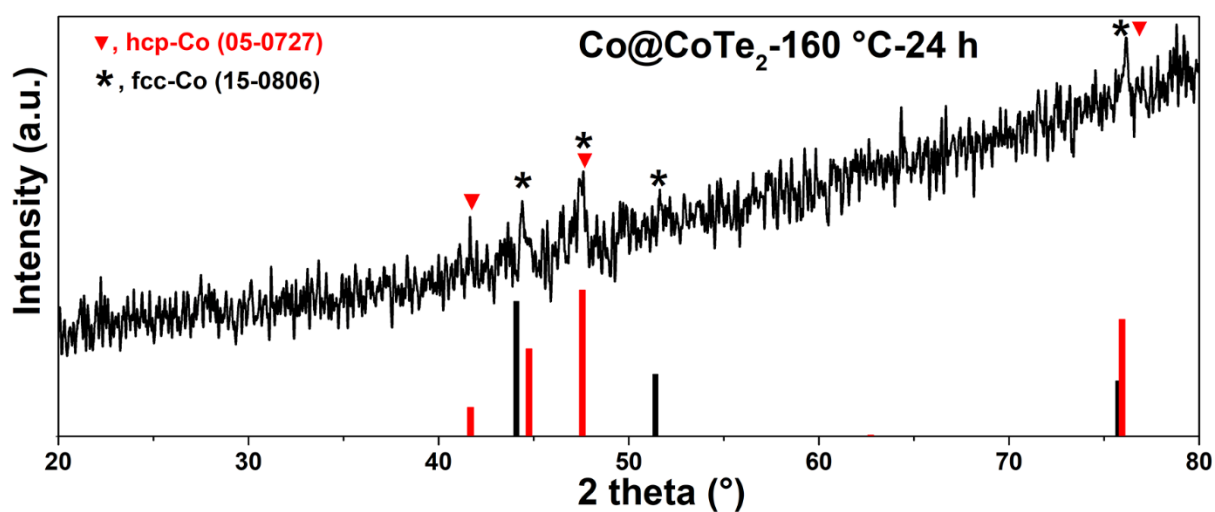

Fig. S2 XRD pattern of Co@CoTe<sub>2</sub> electrode obtained at 160 °C. The standard powder diffraction pattern of metallic cobalt is given for reference.

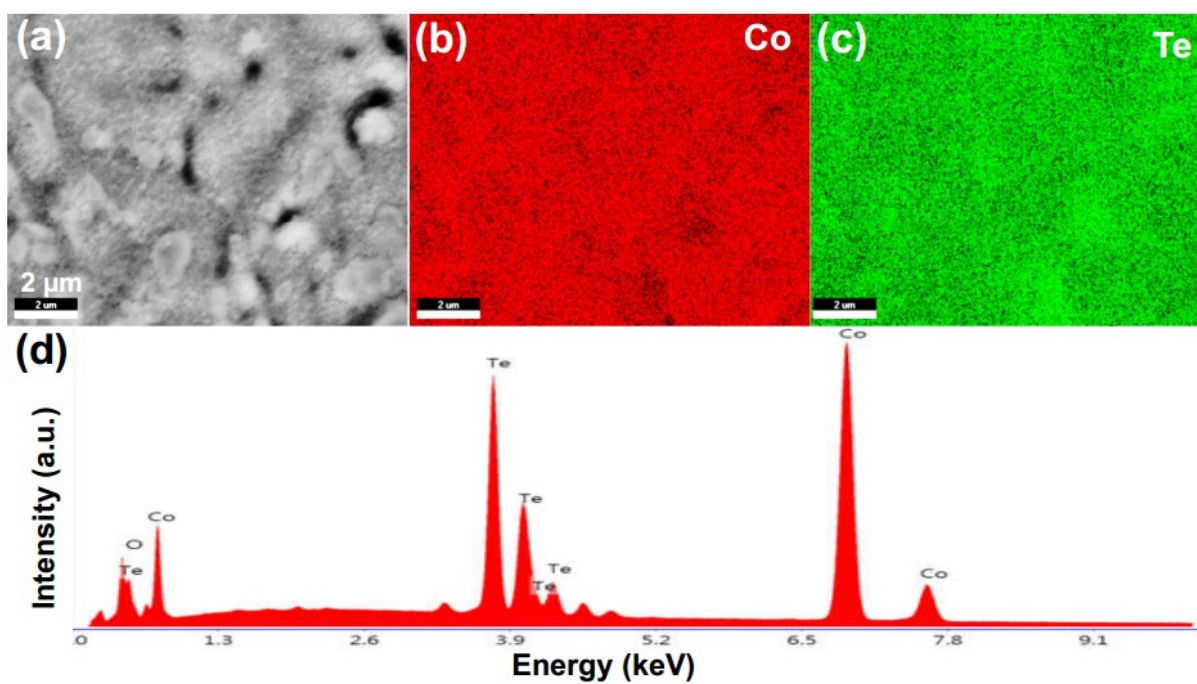

Fig. S3. SEM-EDX results of Co@CoTe<sub>2</sub>-240 electrode.

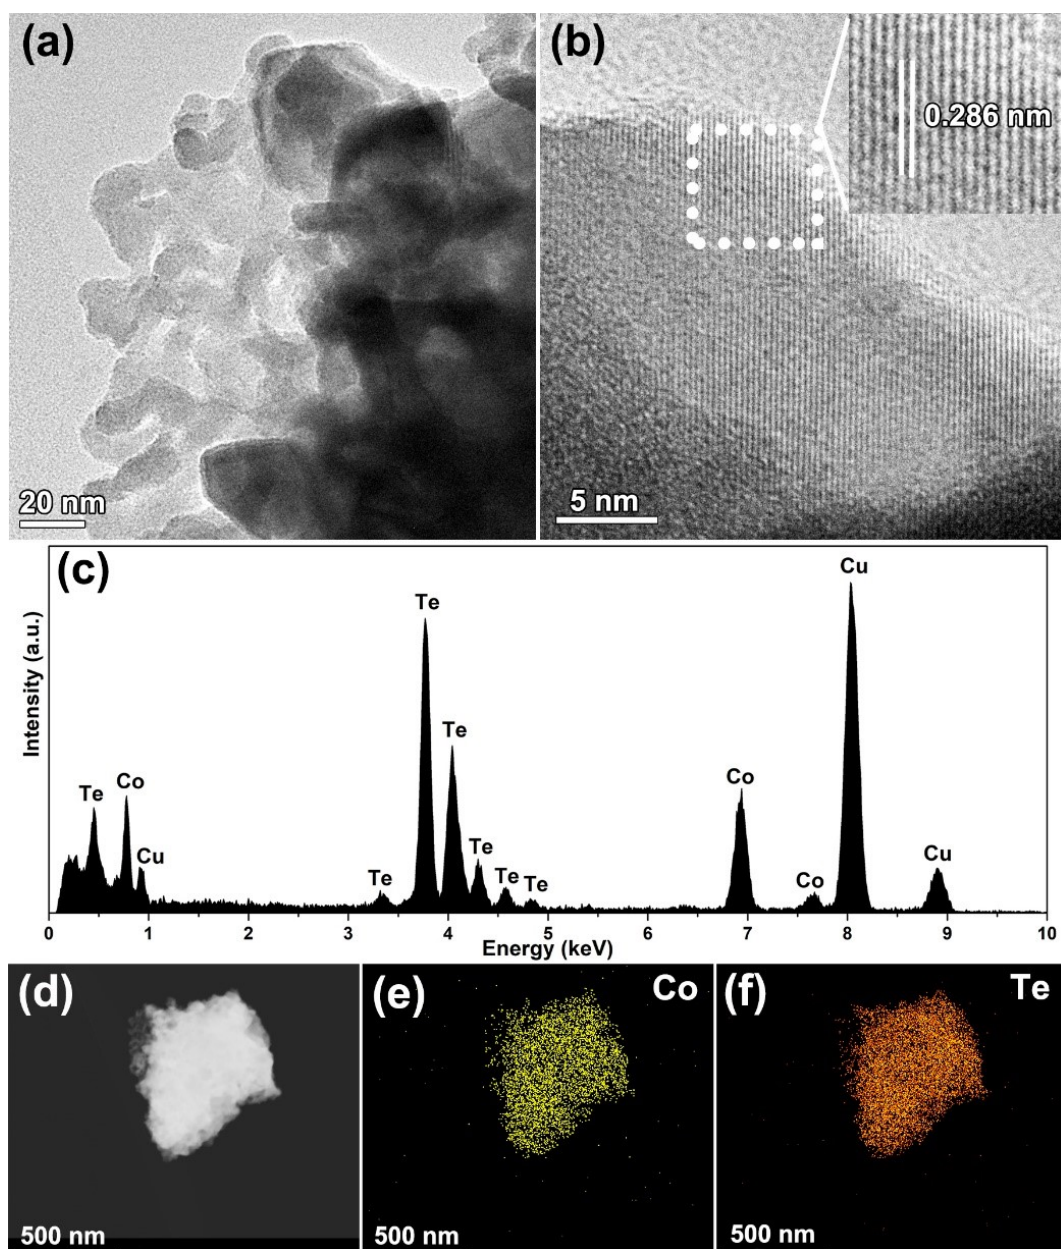

Fig. S4. TEM (a) and high-resolution TEM (b) images, EDX spectrum (c), HAADF-STEM image (d) and elemental maps (e-f) of Co@CoTe<sub>2</sub>-200 electrode. The inset in (b) is a zoomed view of the lattice fringe.



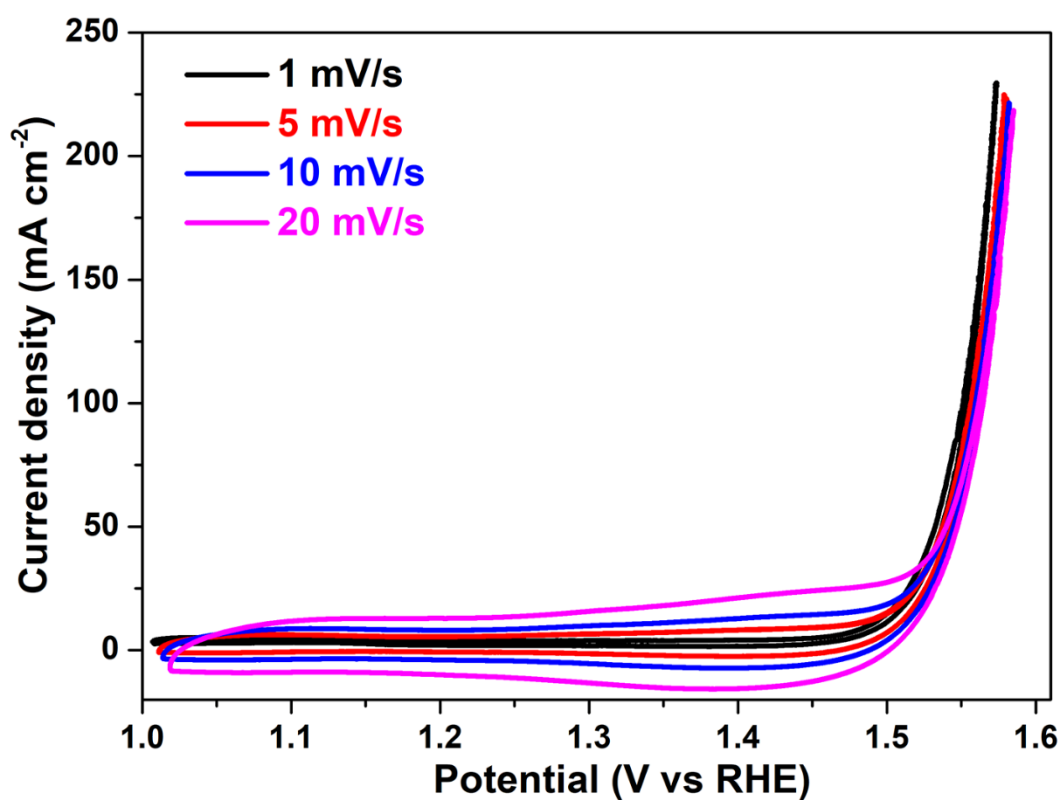

Fig. S5. CV scans of the Co@CoTe<sub>2</sub>-240 electrode for OER with different sweep speeds, including of 1, 5, 10 and 20 mV/s.

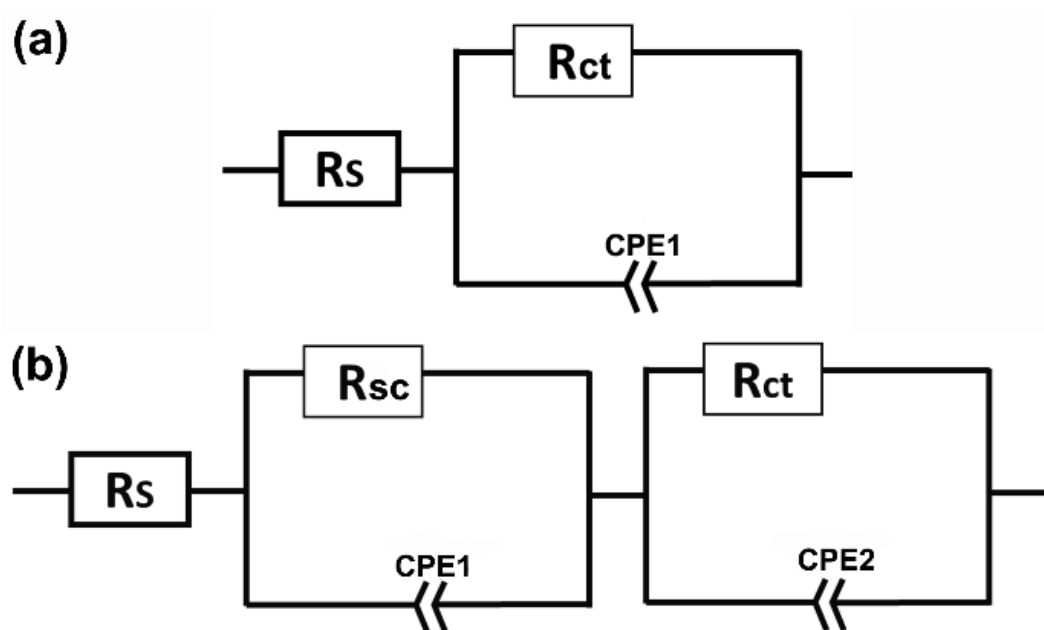

Fig. S6. Equivalent circuit models of bare Co foam (a) and Co@CoTe<sub>2</sub> electrodes (b) used for EIS fitting.

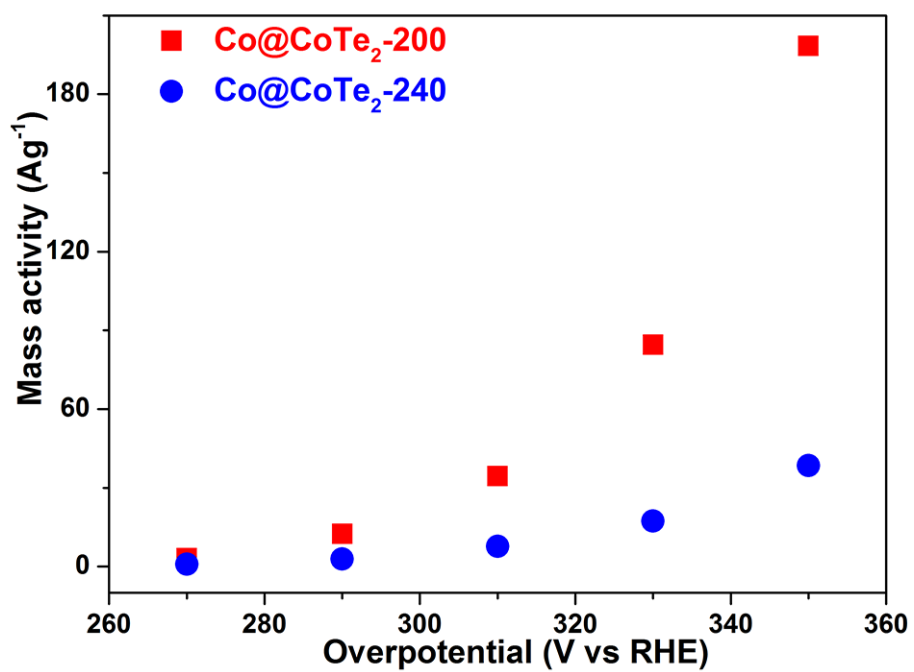

Fig. S7. Mass activity as a function of the overpotential for Co@CoTe<sub>2</sub> electrodes.

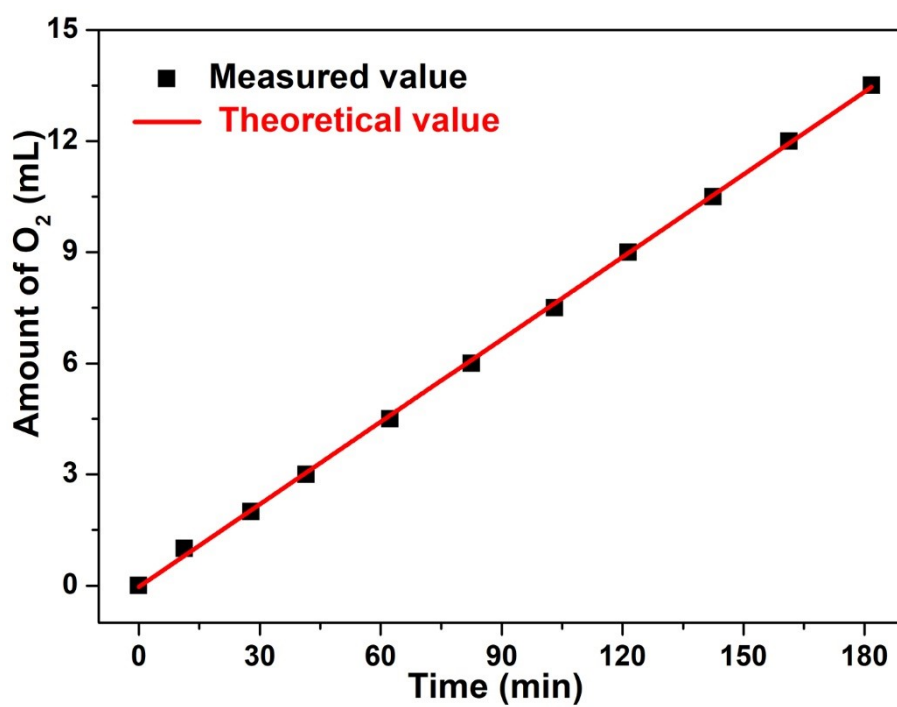

Fig. S8 The amount of gas theoretically calculated and experimentally measured vs. time for Co@CoTe<sub>2</sub>-240 electrode over time recorded at 20 mA cm<sup>-2</sup> in 1 M KOH.

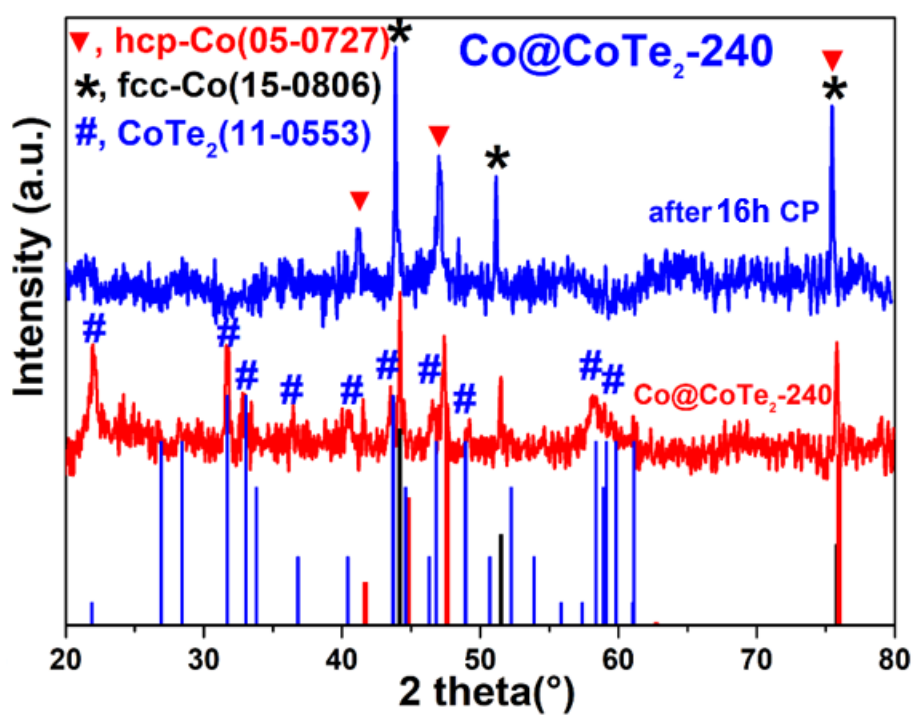

Fig. S9. XRD patterns of the Co@CoTe<sub>2</sub>-240 electrode before and after the long-term stability test for 16 hours under OER conditions.

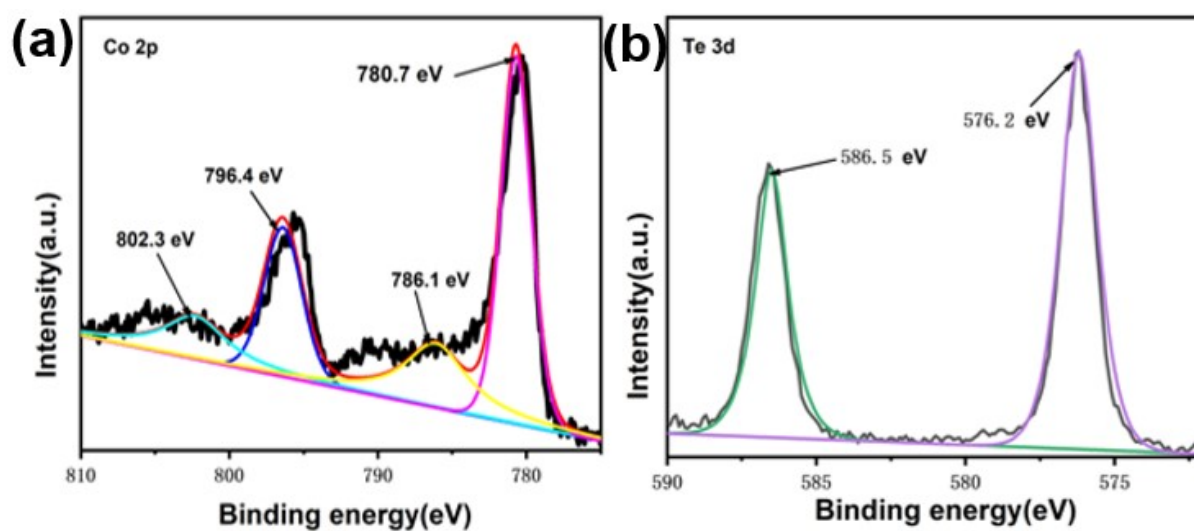

Fig. S10. High-resolution XPS spectra of Co 2p (a) and Te 3d (b) for Co@CoTe<sub>2</sub>-240 electrode after the long-term stability test for 16 hours under OER conditions.

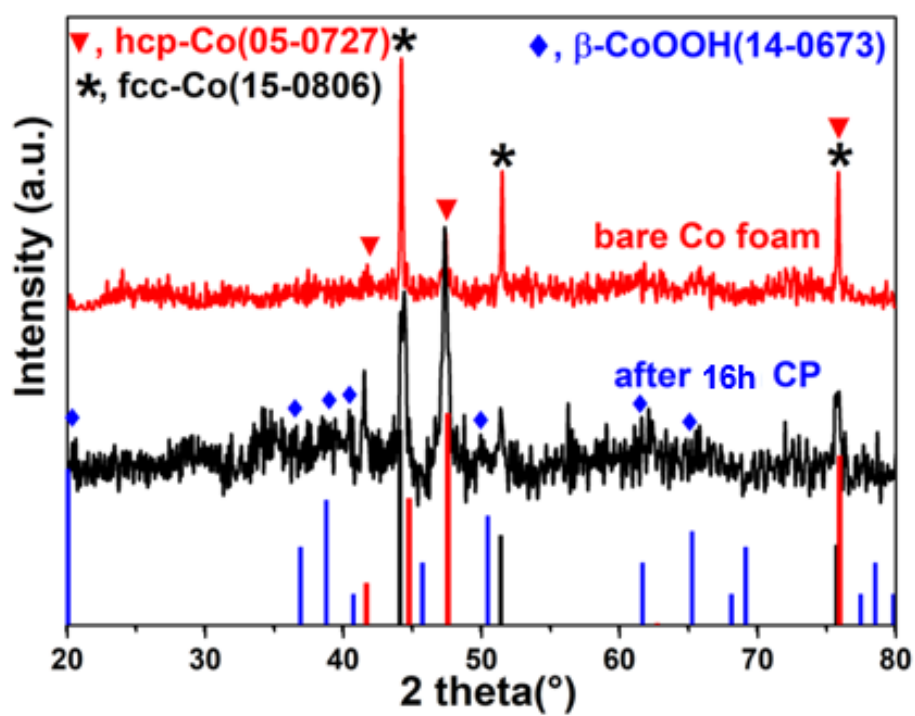

Fig. S11. XRD patterns of bare Co foam electrode before and after the long-term stability test for 16 hours under OER conditions.

## Supplementary Tables:

**Table S1.** The OER activity of Co@CoTe<sub>2</sub> electrodes in comparison to that of other cobalt based chalcogenide OER catalysts recently reported in the literatures.

| Catalysts                                | Electrolyte  | Loadin<br>g mass<br>(mg<br>cm <sup>-2</sup> ) | Tafel slope<br>(mV dec <sup>-1</sup> ) | $J_{geo}$<br>(current<br>density in mA<br>cm <sup>-2</sup><br>@overpotentia<br>l in mV) | Reference                                                          |
|------------------------------------------|--------------|-----------------------------------------------|----------------------------------------|-----------------------------------------------------------------------------------------|--------------------------------------------------------------------|
| Co@CoTe <sub>2</sub>                     | 1.0 M<br>KOH | 0.00                                          | 75.6                                   | 10@ $\eta$ =360                                                                         | This work                                                          |
|                                          |              | 1.01                                          | 40.8                                   | 10@ $\eta$ =286<br>50@ $\eta$ =318<br>100@ $\eta$ =334                                  |                                                                    |
|                                          |              | 4.76                                          | 42.0                                   | 10@ $\eta$ =284<br>50@ $\eta$ =317<br>100@ $\eta$ =335                                  |                                                                    |
| CoTe <sub>2</sub> /CNT/GCE               | 1.0 M<br>KOH |                                               | 44.2                                   | 10@ $\eta$ =290                                                                         | <i>J. Phys. Chem. C</i><br>2016, 120, 49,<br>28093-28099.          |
| CoTe <sub>2</sub> /GCE                   |              |                                               | 85.1                                   | 10@ $\eta$ =323                                                                         |                                                                    |
| CoTe <sub>2</sub> /GCE                   | 1.0 M<br>KOH | 0.28                                          | 58                                     | 10@ $\eta$ =380                                                                         | <i>ACS Catal.</i> 2016,<br>6, 7393-7397.                           |
| CoTe <sub>2</sub><br>nanofleeces/GCE     | 0.1 M<br>KOH | 0.25                                          | 32                                     | 10@ $\eta$ =357                                                                         | <i>Angew. Chem.</i><br><i>Int. Ed.</i> 2017, 56,<br>7769-7773.     |
| CoTe nanofleeces<br>/GCE                 |              |                                               | 73                                     | 10@ $\eta$ =365                                                                         |                                                                    |
| CoTe <sub>2</sub> -MnTe <sub>2</sub> /Ti | 1.0 M<br>KOH | 1.96                                          | 118                                    | 50@ $\eta$ =310                                                                         | <i>Chem. Commun.</i> ,<br>2018, 54, 10993-<br>10996.               |
| CoTe <sub>2</sub> @NCNTFs                | 1.0 M<br>KOH | 0.285                                         | 82.8                                   | 10@ $\eta$ =330                                                                         | <i>J. Mater. Chem.</i><br><i>A</i> , 2018, 6, 3684-<br>3691.       |
| CoTe <sub>2</sub> @NC                    |              |                                               | 94.9                                   | 10@ $\eta$ =350                                                                         |                                                                    |
| CoTe <sub>2</sub> NA/Ti                  | 1.0 M<br>KOH | 1.45                                          | 67                                     | 50@ $\eta$ =340                                                                         | <i>ACS Sustainable</i><br><i>Chem. Eng.</i> 2018,<br>6, 4481-4485. |
| CoTe <sub>2</sub> @NF                    | 1.0 M<br>KOH | 1.25                                          | 54                                     | 10@ $\eta$ =340                                                                         | <i>Electrochimica</i><br><i>Acta</i> , 2019, 307,<br>451-458.      |
| CoTe                                     | 1.0 M<br>KOH | ~                                             | 93.1                                   | 10@ $\eta$ =445                                                                         | <i>Electrochimica</i><br><i>Acta</i> , 2019,                       |
| Fe-CoTe                                  |              |                                               | 45.0                                   | 10@ $\eta$ =300                                                                         |                                                                    |



*Supplementary information*

|                                                           |           |       |      |                      |                                                              |
|-----------------------------------------------------------|-----------|-------|------|----------------------|--------------------------------------------------------------|
|                                                           |           |       |      |                      | 134656.                                                      |
| Co(Te <sub>0.72</sub> Se <sub>0.28</sub> ) <sub>2</sub>   | 1.0 M KOH | 1±0.1 | 69   | 10@η=315             | <i>Nanoscale</i> , 2019, 11, 6108-6119.                      |
| Co(Te <sub>0.33</sub> Se <sub>0.67</sub> ) <sub>2</sub>   | 1.0 M KOH |       | 44   | 10@η=272             |                                                              |
| CoTe NR/NF                                                | 1.0 M KOH | 1.3   | 75   | 100@η=350            | <i>Small Methods</i> . 2019, 3, 1900113.                     |
| NiTe NR/NF                                                | 1.0 M KOH |       | 122  | 100@η=430            |                                                              |
| Co <sub>0.13</sub> Ni <sub>0.87</sub> Se <sub>2</sub> /Ti | 1.0 M KOH | 1.67  | 94   | 100@η=320            | <i>Nanoscale</i> , 2016, 8, 3911-3915.                       |
| Porous CoSe <sub>2</sub> NA/CC                            | 1.0 M KOH | 0.50  | 115  | 10@η=290             | <i>ACS Appl. Mater. Interfaces</i> 2017, 9, 41, 35927-35935. |
| CoSe <sub>2</sub> NA/CC                                   |           |       | 124  | 10@η=360             |                                                              |
| CoSe <sub>2</sub> UNM <sub>vac</sub>                      | 1.0 M KOH | 0.28  | 46.3 | 10@η=284             | <i>J. Mater. Chem. A</i> , 2019, 7, 2536-2540.               |
| CoSe <sub>2</sub> NS                                      |           |       | 97.7 | 10@η=343             |                                                              |
| CoSe@NCNT/N CN                                            | 1.0 M KOH | 0.357 | 75   | 10@η=310             | <i>Electrochimica Acta</i> , 2020, 337, 135685.              |
| CoSe <sub>2</sub> @MoSe <sub>2</sub>                      | 1.0 M KOH | 0.6   | 84   | 10@η=309             | <i>Nanoscale</i> , 2020, 12, 326-335.                        |
| Co <sub>9</sub> S <sub>8</sub> @NC                        | 1.0 M KOH | 0.22  | -    | 10@η=320             | <i>Dalton Trans.</i> , 2016, 45, 6352-6356.                  |
| Ni <sub>3</sub> S <sub>2</sub> @NC                        | 1.0 M KOH |       | -    | 10@η=390             |                                                              |
| Co <sub>9</sub> S <sub>8</sub> @NC                        | 0.1 M KOH |       | 124  | 10@η=370             |                                                              |
| Ni <sub>3</sub> S <sub>2</sub> @NC                        | 0.1 M KOH |       | 196  | 10@η=470             |                                                              |
| N-Co <sub>9</sub> S <sub>8</sub> /graphene                | 0.1 M KOH | 0.2   | 82.7 | 10@η=409             | <i>Energy Environ. Sci.</i> , 2016, 9, 1320-1326.            |
| NA-Co <sub>9</sub> S <sub>8</sub> /graphene               |           |       | 83   | 10@η=441             |                                                              |
| Co <sub>9</sub> S <sub>8</sub>                            | 1.0 M KOH | 0.24  | 85.6 | 10@η=340             | <i>J. Mater. Chem. A</i> , 2016, 4, 18314-18321.             |
| Co <sub>9</sub> S <sub>8</sub> /CNS                       |           |       | 50.7 | 10@η=294             |                                                              |
| Co <sub>9</sub> S <sub>8</sub> /CNS/CNT                   |           |       | 48.2 | 10@η=267             |                                                              |
| Co@Co <sub>9</sub> S <sub>8</sub> -180                    | 1.0 M KOH | 1.09  | 55   | 10@η=350             | <i>Chem. Eur. Journal</i> , 2017, 23: 8749-8755.             |
| Co@Co <sub>9</sub> S <sub>8</sub> -220                    |           | 9.73  | 52   | 10@η=360             |                                                              |
| CoS <sub>2</sub> hollow nanospheres/CP                    | 1.0 M KOH | 1.5   | 57   | 10@η=290<br>20@η=305 | <i>Nanoscale</i> , 2018,10, 4816-4824.                       |
| Fe-CoS <sub>2</sub> /CC                                   | 1.0 M KOH | ~     | 128  | 10@η=302             | <i>Chem. Commun.</i> , 2019, 55, 2469-2472.                  |
| CoS/CNT                                                   | 1.0 M KOH | 1.1   | 142  | 10@η=330             | <i>Appl. Surf. Sci.</i> , 2019, 466, 830-836.                |

*Supplementary information*

|                                                   |              |   |    |          |                                                  |
|---------------------------------------------------|--------------|---|----|----------|--------------------------------------------------|
| Co <sub>8</sub> FeS <sub>8</sub> /CoS@C<br>NT-500 | 1.0 M<br>KOH | ~ | 49 | 10@η=278 | <i>J. Power Sour.</i> ,<br>2020, 449,<br>227561. |
| Co <sub>8</sub> FeS <sub>8</sub> /CoS             |              |   | 83 | 10@η=292 |                                                  |

*Supplementary information*

---

**Table S2.** Fitting parameters for the Nyquist plots of the bare Co foam, Co@CoTe<sub>2</sub>-200 and Co@CoTe<sub>2</sub>-240 electrodes.

| Samples                   | $R_s(\Omega)$ | $R_{sc}(\Omega)$ | $C_{sc} (F \text{ cm}^{-2} \text{ S}^{\text{m}^{-1}})$ | $R_{ct} (\Omega)$ | $C_h (F \text{ cm}^{-2} \text{ S}^{\text{m}^{-1}})$ |
|---------------------------|---------------|------------------|--------------------------------------------------------|-------------------|-----------------------------------------------------|
| Co foam                   | 1.07          | -                | -                                                      | 2.75              | 0.848                                               |
| Co@CoTe <sub>2</sub> -200 | 0.98          | 0.05             | 0.346                                                  | 0.40              | 0.372                                               |
| Co@CoTe <sub>2</sub> -240 | 1.13          | 0.06             | 0.239                                                  | 0.48              | 0.357                                               |
